# Supplementary material for: Cancer-derived Circulating MicroRNAs Promote Tumor Angiogenesis by Entering Dendritic Cells to Degrade Highly Complementary MicroRNAs
Source: PubMed Central journal article supplement — Theranostics. 2017 Mar 24;7(6):1407–21. doi: 10.7150/thno.18262 (PMC5436502; doi:10.7150/thno.18262), 2017-03-24
Supplement: thnov07p1407s1.pdf [file thnov07p1407s1.pdf]

## Supplementary Figure Legends

**Supplementary Figure S1. The levels of three circulating miRNAs in the peripheral bloods from patients of five cancer types are detected with qRT-PCR assay.**

**A.** Levels of miR-410-3p, miR-410-5p and pre-miR-410 in the serum from patients with five cancer types: ovarian cancer (n=12), prostate cancer (n=20), endometrial cancer (n=8), liver cancer (n=23) and renal cancer (n=13), in comparison with controls (n=7) \*P<0.05, \*\* P<0.01.

**B.** Levels of miR-410-3p, miR-410-5p and pre-miR-410 in cytoplasm (upper panel) and the culture medium (CM) (lower panel) of 7 cancer cell lines. Mean  $\pm$ SD of three independent experiments. \*\* P<0.01.

**C.** Levels of miR-410-5p in the culture medium (CM) of DU145 and RM-1 cells treated with RNase A1. U6 was used as a positive control. Mean  $\pm$ SD of three independent experiments, \*\* P<0.01.

**D.** Representative IP result of miR-410-5p in the protein complex. Upper panel: IP was performed with antibodies of AGO2, CD63 (common antibody for exosome) on the samples of both cytoplasm and the culture medium (CM) of DU145 and RM-1. Positive control: Cell lysis and culture medium (CM) of DU145 and RM-1, respectively. Lower panel: IP was performed with antibodies of AGO2 and CD63 on the serum samples of seven-month-old Pb-Cre<sup>+</sup>&Pten<sup>L/L</sup> transgenic mice and patients with prostate cancer (PCa). 1, Positive control: serum of a PCa patient with a high level of miR410-5p. 2, Negative control: Protein A.

**E.** Left panel: Quantitative PCR of AGO2 mRNA level in the cytoplasm of prostate

normal cell RWPE1 and cancer cell lines DU145 and RM-1. Mean  $\pm$  SD of three independent experiments, \*\* P< 0.01. Right panel: Immunostaining for AGO2 protein in the samples of the culture medium (CM) of prostate normal cell RWPE1 and cancer cell lines DU145 and RM-1.

**Supplementary Figure S2. Dendritic cells (DCs) are the recipient cells of miR-410-5p produced by tumor cells.**

**A.** Immunofluorescence (IF) assay with anti-AGO2 (upper, red) and anti-FLAG (lower, green) antibodies on the cultured cells of DU145 (left) and RM-1 (right) after transfected with pcDNA3.1-AGO2-FLAG (Ago2-FLAG) or blank control of backbone vector pcDNA3.1 (pcDNA3.1). Blue indicated the cell nuclei stained with DAPI. Scale bars represent 10 $\mu$ m.

**B.** Stable over-expressions from the constructed vector pcDNA3.1-AGO2-FLAG (Ago2-Flag) in transfected DU145 and RM-1 cells were proved by western blot (WB). DU145 and RM-1 cells transfected with backbone vector pcDNA 3.1(pcDNA3.1) were used as control.

**C.** miR-410-5p displayed in gel electrophoresis and AGO2 displayed in western blot (WB) after IP of Ago2-Flag protein complexes against Flag from samples of cytoplasm (upper) and the culture medium (CM) (lower) of both DU145 and RM-1 cells transfected with pcDNA3.1-Ago2-Flag.

**Supplementary Figure S3. Dendritic cells (DCs) are the recipient cells of miR410-5P produced by tumor cells.**

Immunofluorescence (IF) with double staining of anti-FLAG (middle) and anti-

CD11c (right) antibodies on the samples of prostate tumor (upper), lymph node (middle, **arrowhead** indicates representative cell with FLAG positive but CD11c negative) and spleen (lower) from the RM-1 tumor-bearing mice. The images were acquired by Leica confocal laser scanning microscope (Leica TCS MP). Blue indicated cell nuclei stained with DAPI. White Scale bars represent 10 $\mu$ m.

**Supplementary Figure S4. The difference in the level of miRNAs in dendritic cells (DCs) under different tumor conditions.**

**A.** Morphology of DCs from normal C57BL/6J mice, which were co-cultured with RM-1 cells (RM-1(C)) or with debris of RM-1 cells (RM-1(D)) in assay of real-time imaging flow cytometry (Amnis image stream mkII) . DCs co-cultured with RM-1 cells did not have featured pseudopods, which is a morphological feature of normal DCs. Bright (grey): the co-cultured DCs; CD11c (red): a common marker for all DCs; CD80 (green) & CD86 (yellow): common markers only for matured DCs. Scale bars represent 10 $\mu$ m.

**B.** Clear distinction between the DCs co-cultured with RM-1 cells (RM-1(C)) or with debris of RM-1 (RM-1(D)) for 48 miRNAs was displayed by bootstrapping hierarchical clustering analysis.

**Supplementary Figure S5. Intratumoral injection of miR-410-3p down-regulates VEGF $\alpha$  level to inhibit tumor growth.**

**A.** Results of qRT-PCR (left panel) and western blot (right panel) for samples from RM-1-tumor-bearing mice. Mean  $\pm$  SD of three independent experiments, \*\* P<0.01.

**B.** Intratumoral injection of miR-410-3p inhibits the growth of tumors in both RM-

1-tumor-bearing mice (left panel) and DU145-tumor-bearing nude mice (right panel). Representative results from mice with intratumoral injection of miR-410-3p and miR-mock, respectively. Tumor size for each individual mouse was measured twice every week and graphed in analysis; each curve represents the tumor size of a single mouse (five mice in each group). The curve ends on the time point of mouse death.

**Supplementary Figure S6. miRNA combination assessment using FRET assay.**

**A.** Duplexes combination of miR-410-5p/miR-335-5p; miR-410-5p/Anti-miR-410-5p and miR-590-5p/ Anti-miR-410-5p.

**B.** Levels of miR-410-5p and miR-590-5p in the DCs co-cultured with RM-1 cells under non-contact condition and transfected with siRNA. Mean  $\pm$  SD of three independent experiments, \*\* P< 0.01.

**C.** Representative results of in vivo cellular localization of FAM (Ex:488nm, Em:516nm) and Cy3 (Ex:508-532nm, Em:568nm) in the dendritic cells at the time after co-transfections with labeled miRNAs for 6 h, which were observed by real-time imaging flow cytometry (Amnis image stream mkII) . Scale bars represent 10  $\mu$ m.

**D.** Mean fluorescence intensity (MFI) of both FAM and FRET (FAM $\rightarrow$ Cy3) in dendritic cells co-transfected with labeled miRNAs, which was analyzed with real-time imaging flow cytometry. Values of MFI are indicated. Mean  $\pm$ SD of three independent experiments.

**Supplementary Figure S7. Diagram of miRNAs labeling and in vitro FRET**

**assay.**

**A.** Schematic diagram of miRNA labeling and their combinations.

**B.** Time course of donor (FAM) and acceptor (Cy3) emission intensities, represented in the average values of in vitro micro-plate reader at each indicated time point.

**C.** Schematic diagram of double labeling of miR-410-3p, mmu-miR-1896-5p, miR-335-5p, miR-410-5p and miR-590-5p and schematic diagram of their combinations.

**Supplementary Figure S8. miRNA degradation assessment using FRET assay.**

**A.** Representative results of in vivo cellular localization of FAM (Ex:488nm, Em:516nm) and Cy3 (Ex:508-532nm, Em:568nm) in Dendritic cells at the time of 6 h post co-transfection with labeled miRNAs analyzed by real-time imaging flow cytometry (Amnis image stream mkII) . Scale bars represent 10 $\mu$ m.

**B.** Values of MFI are indicated. Mean  $\pm$  SD of three independent experiments.

**Supplementary Figure S9 Reduction of miR-410-5p suppresses growth of tumors in Pb-Cre<sup>+</sup> & Pten<sup>L/L</sup> transgenic mice.**

**A.** Genotype analysis to prove the used Pb-Cre<sup>+</sup>&Pten<sup>L/L</sup> transgenic mice (upper panel) and the seven-month-old Pb-Cre<sup>+</sup>&Pten<sup>L/L</sup> transgenic mice.

**B.** Results of immunofluorescence (IF) assay to analyze prostate tissues MVD of Pb-Cre<sup>+</sup> & Pten<sup>L/L</sup> transgenic mice after treated with anti-mock and anti-miR-410-5p, respectively. DAPI (blue) represents nucleus; CD31 (red) represents blood vessel.

Scale bars for represents as indicated.

**C.** Representative results of prostates from twenty-eight Pb-Cre<sup>+</sup> & Pten<sup>L/L</sup> transgenic mice (n=14) treated with pLKO-anti-mock (Anti-mock) (left) or pLKO-anti-miR-410-5p (Anti-miR-410-5p) (right) with intraperitoneal injection for three times a week during a total of four weeks. The pictures were photographed by camera ( Olympus EM5 ) . Sv: seminal vesicle; Tu: tumor; Pt: prostate; Bd: bladder; Ur: urethra; Ts: testicle.

# Supplementary Figure S1 Wang et al.

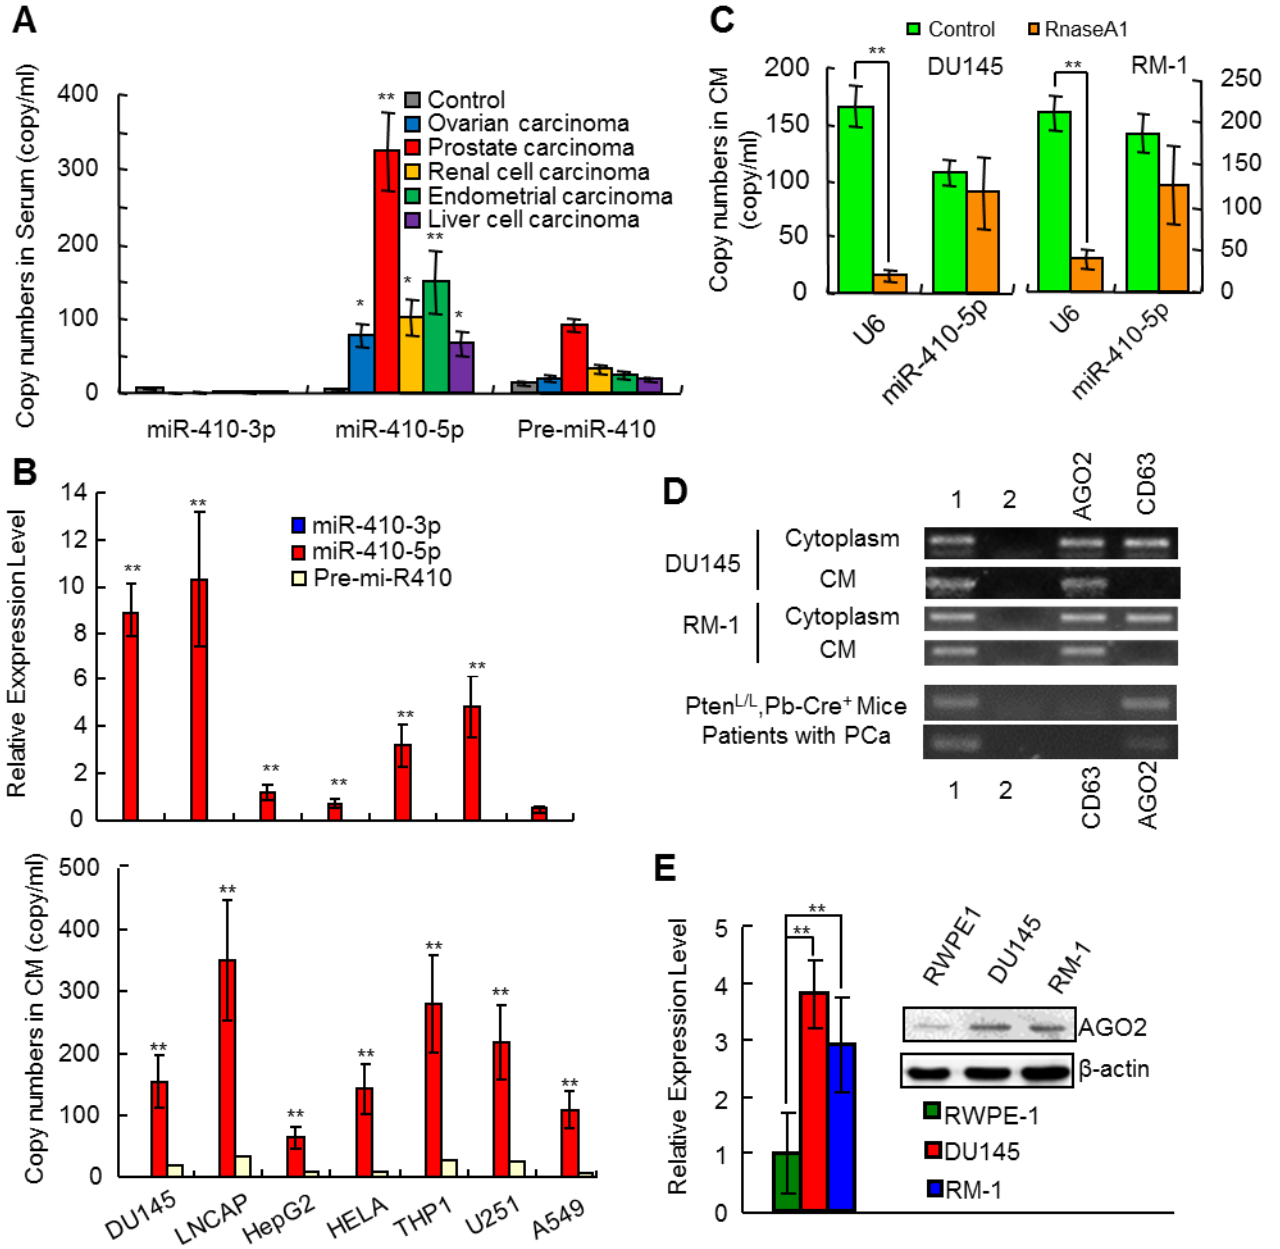

Supplementary Figure S2 Wang et al.

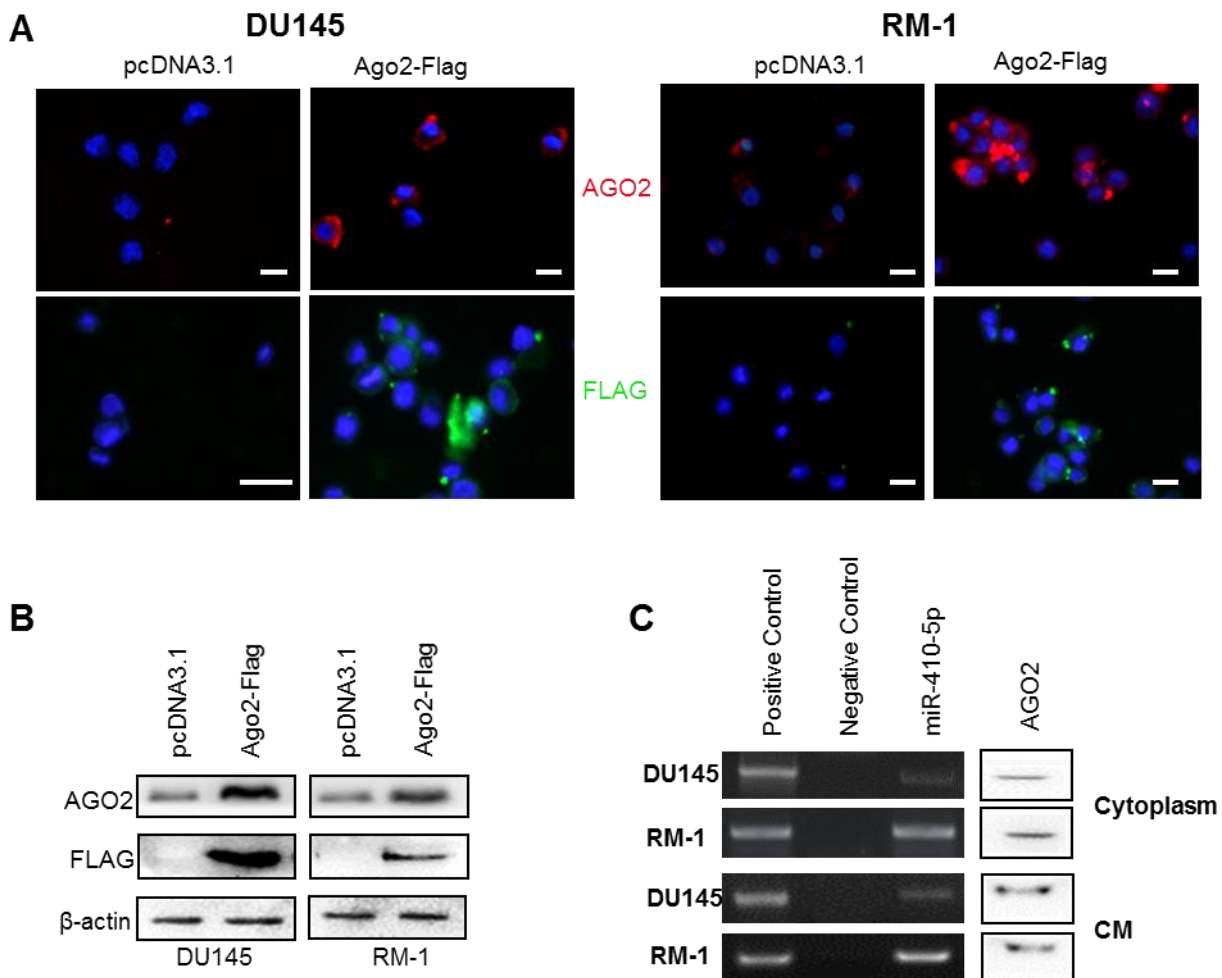



Supplementary Figure S3 Wang et al.

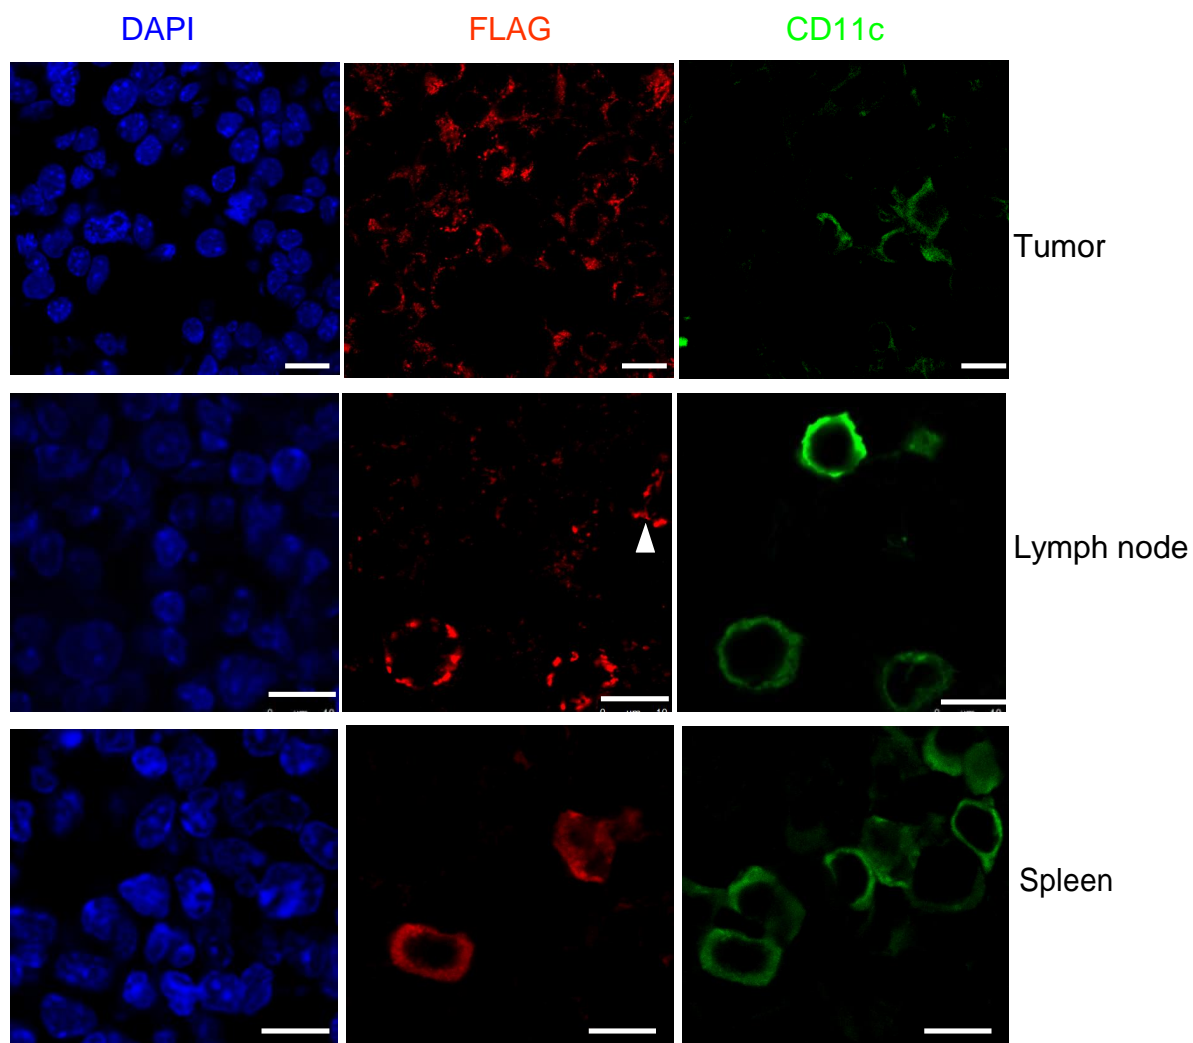

# Supplementary Figure S4 Wang et al.

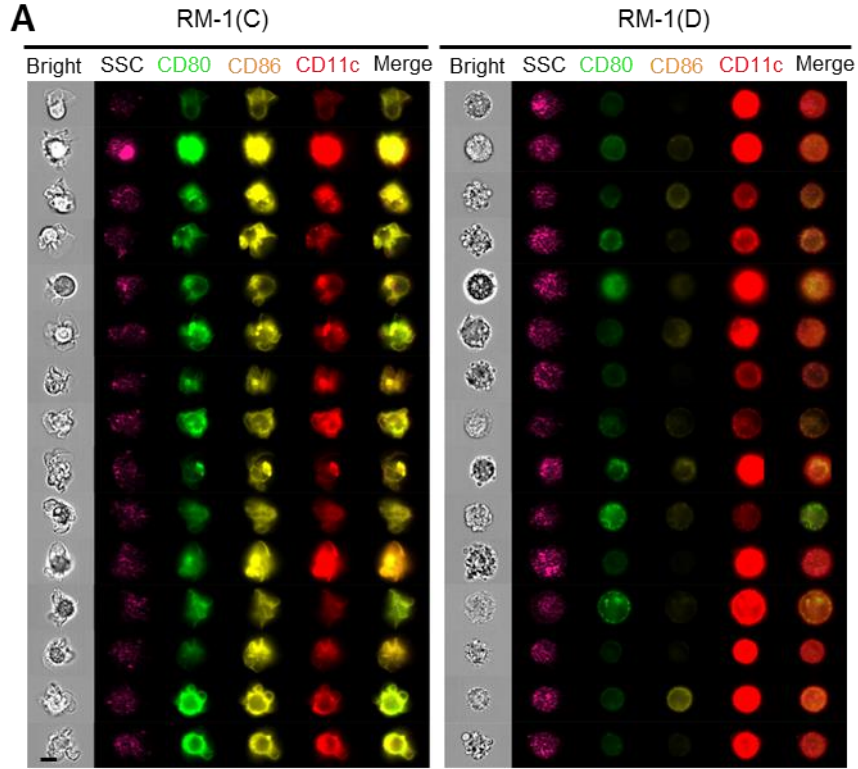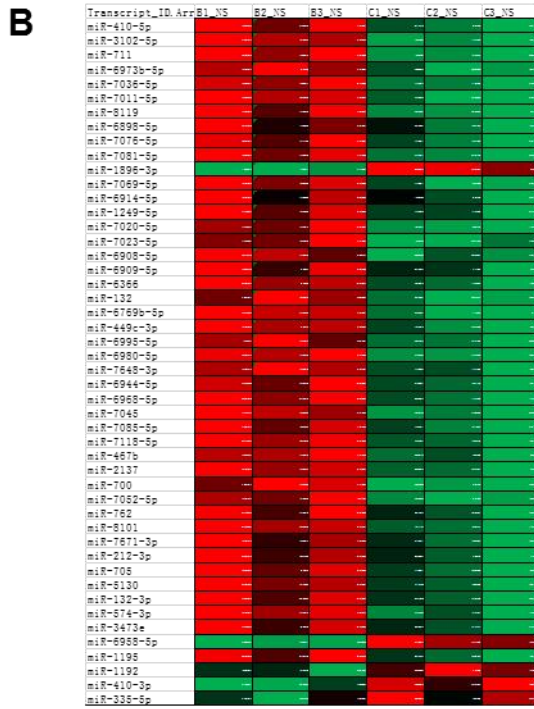

Wang et al.

Wang et al.

Wang et al.

# Supplementary Figure S5 Wang et al.

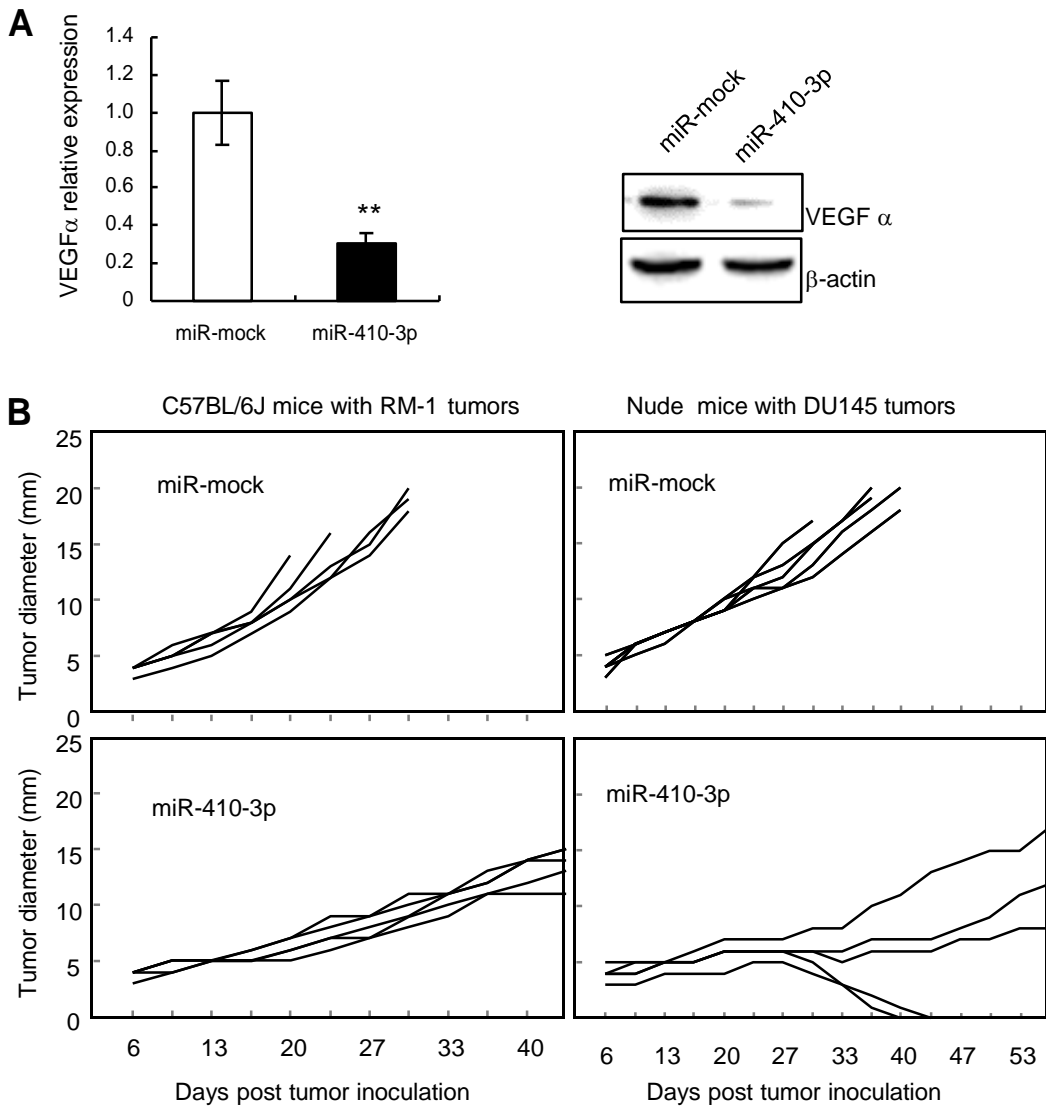

# Supplementary Figure S6 Wang et al.

**A**

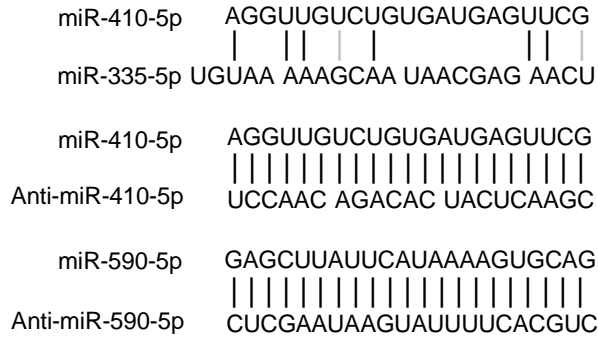

**B**

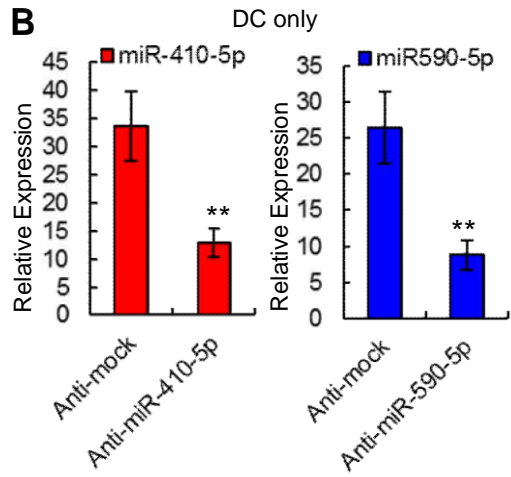

**C**

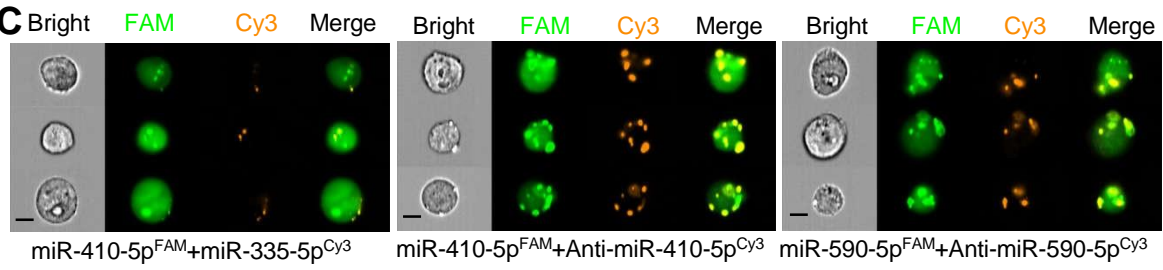

**D**

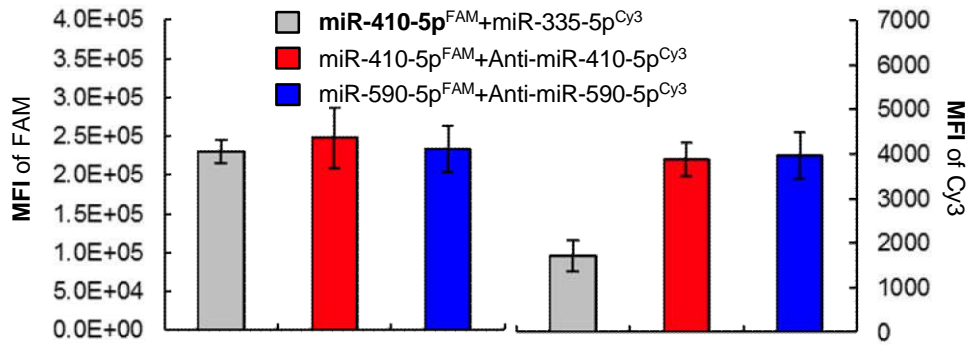

# Supplementary Figure S7 Wang et al.

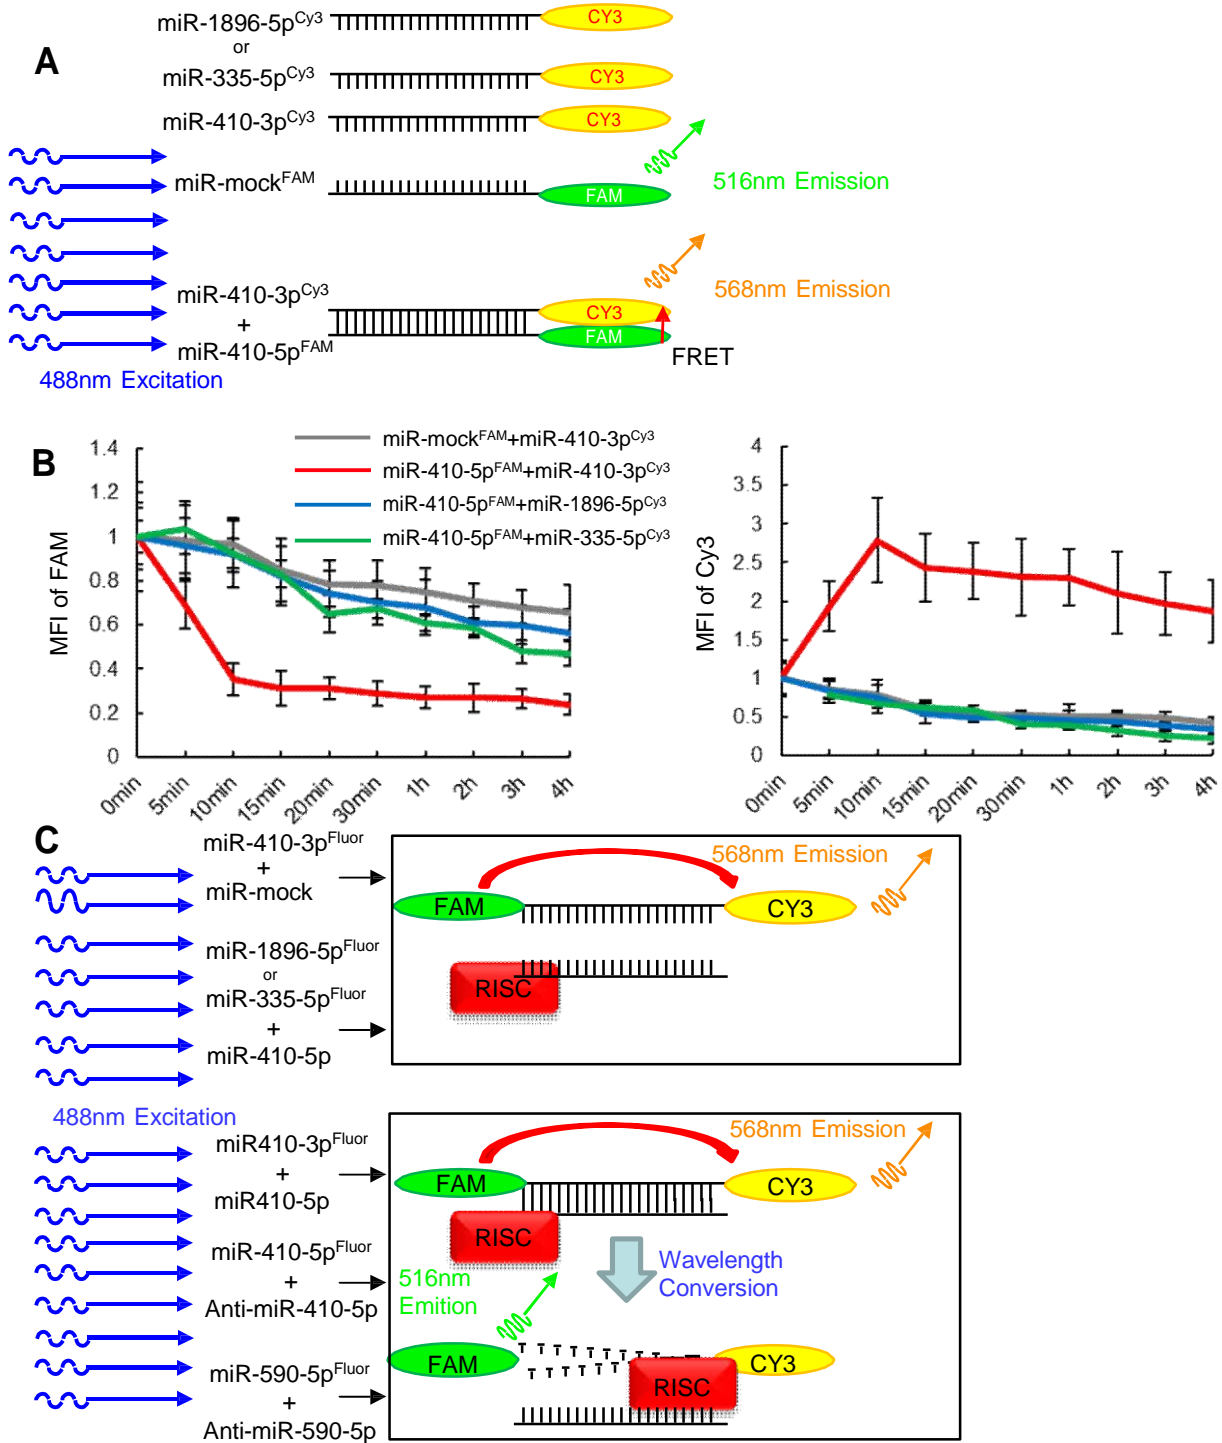

# Supplementary Figure S8 Wang et al.

**A**

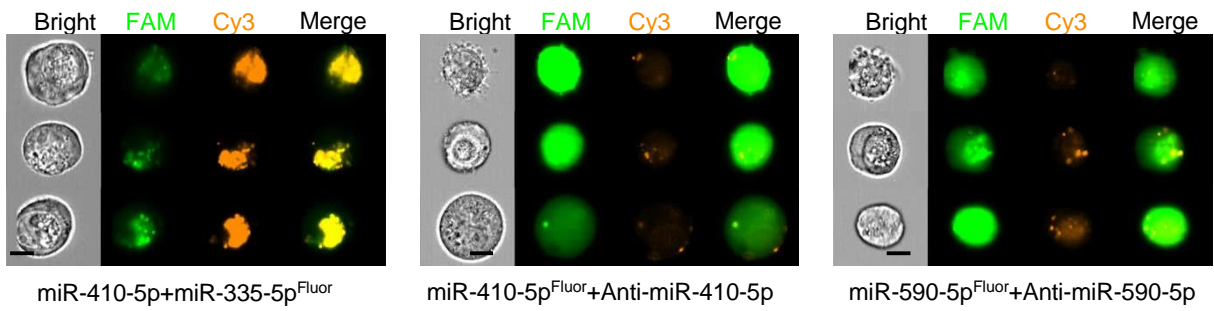

**B**

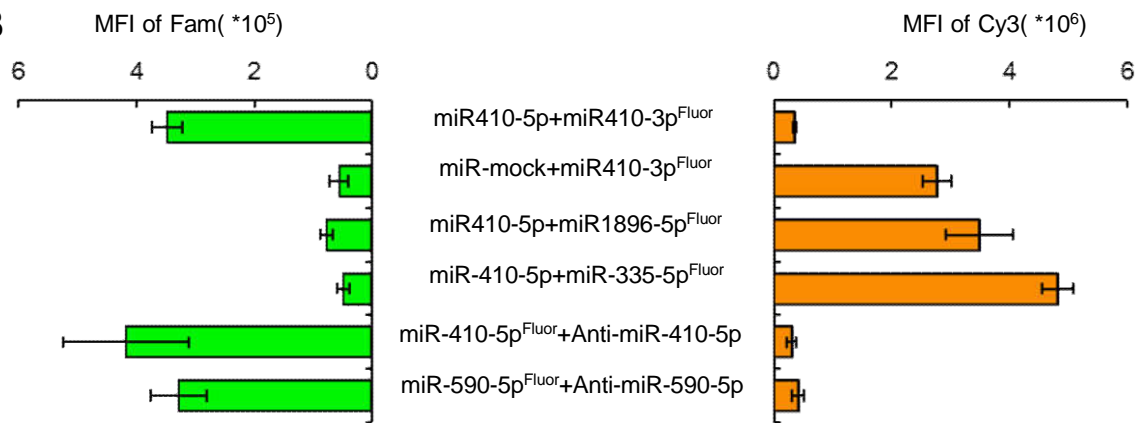

Supplementary Figure S9 Wang et al.

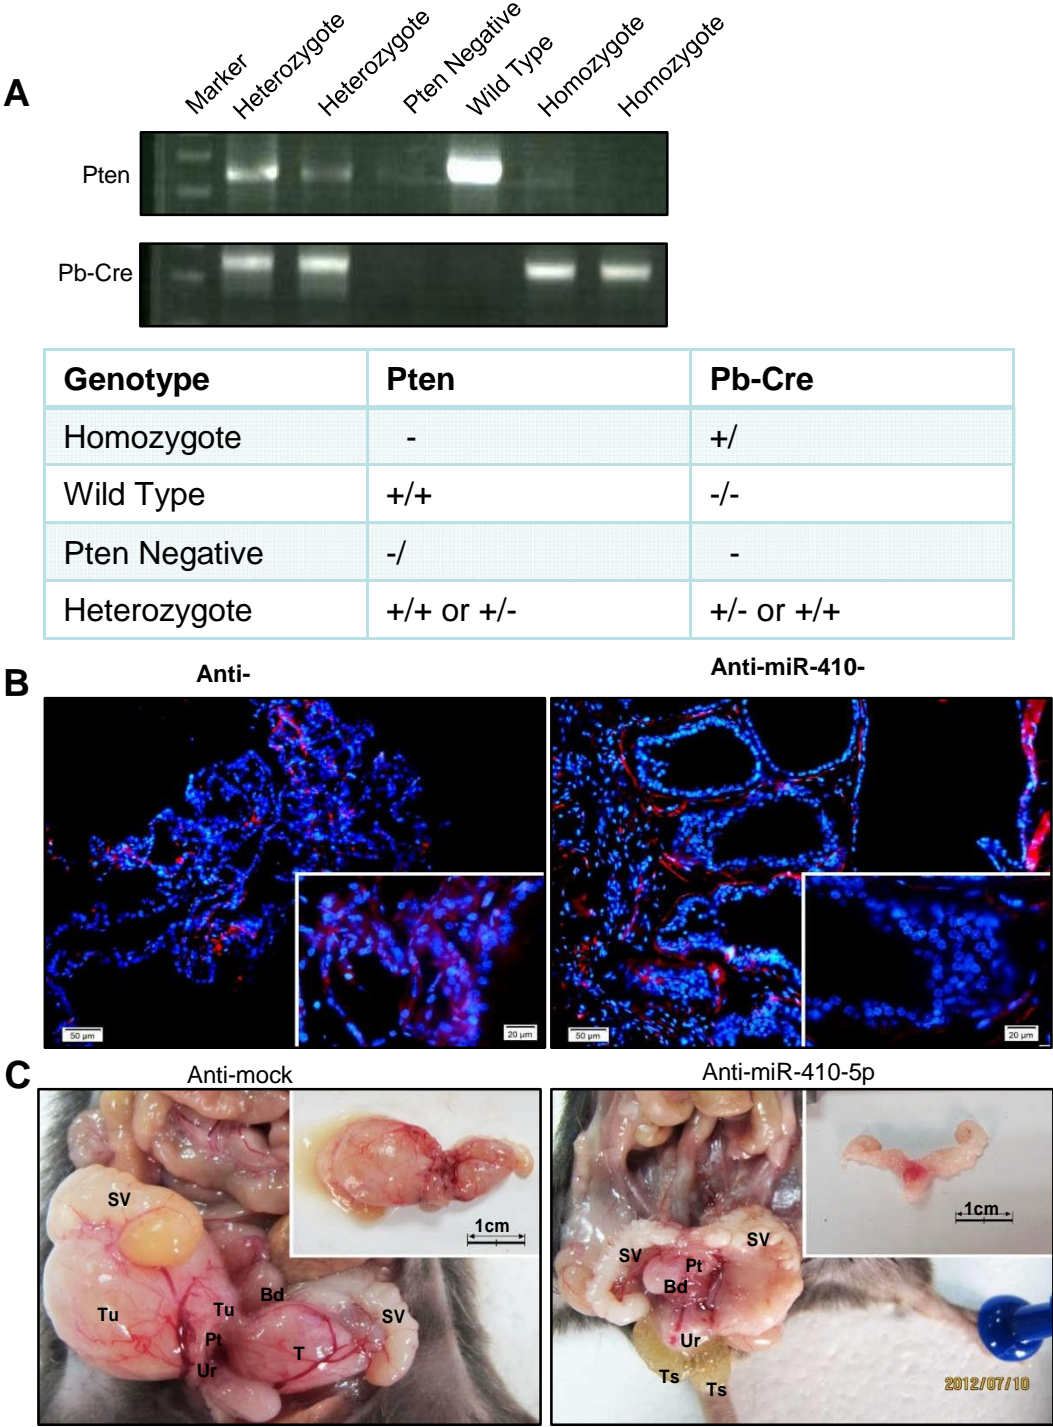

**Supplementary Table 1. Oligonucleotides**

| Name                             | Sequence ( 5' → 3' )           |
|----------------------------------|--------------------------------|
| miR-mock                         | UUGUACUACACAAAAGUACUG          |
| miR-410-3p                       | AAUAUAACACAGAUGGCCUGU          |
| miR-410-5p                       | AGGUUGUCUGUGAUGAGUUCG          |
| miR-mock <sup>FAM</sup>          | FAM-UUGUACUACACAAAAGUACUG      |
| miR-410-3p <sup>Cy3</sup>        | AAUAUAACACAGAUGGCCUGU-Cy3      |
| miR-410-5p <sup>FAM</sup>        | FAM-AGGUUGUCUGUGAUGAGUUCG      |
| mmu-miR-1896-5p <sup>Cy3</sup>   | cucucugaugguggugaggag-Cy3      |
| miR-410-3p <sup>Fluor</sup>      | FAM-AAUAUAACACAGAUGGCCUGU-Cy3  |
| miR-1896-5p <sup>Fluor</sup>     | FAM-cucucugaugguggugaggag-Cy3  |
| miR-590-5p <sup>FAM</sup>        | FAM-GAGCUUAUUCAUAAAAGUGCAG     |
| miR-590-5p <sup>Fluor</sup>      | FAM-GAGCUUAUUCAUAAAAGUGCAG-Cy3 |
| anti-miR-590-5p <sup>Cy3</sup>   | CUCGAAUAAGUAUUUUCACGUC-Cy3     |
| anti-miR-590-5p                  | CUCGAAUAAGUAUUUUCACGUC         |
| anti-miR-410-5p <sup>Cy3</sup>   | UCCAACAGACACUACUCAAGC-Cy3      |
| anti-miR-410-5p <sup>Fluor</sup> | FAM-UCCAACAGACACUACUCAAGC-Cy3  |
| anti-miR-410-5p                  | UCCAACAGACACUACUCAAGC          |
| miR-335-5p <sup>Cy3</sup>        | UGUAAAAAGCAAUACGAGAACU-Cy3     |
| miR-335-5p <sup>Fluor</sup>      | FAM-UGUAAAAAGCAAUACGAGAACU-Cy3 |



**Supplementary Table**

**2. Primers**

| Name                           | Sequence(5' → 3')                                                  | Application                       |
|--------------------------------|--------------------------------------------------------------------|-----------------------------------|
| miR-139-5p-Forward             | TCTACAGTGCACGTGTCTCCAGT                                            | qPCR                              |
| miR-15a-Forward                | TAGCAGCACATAATGGTTTGTG                                             | qPCR                              |
| miR-15b-Forward                | TAGCAGCACATCATGGTTTACA                                             | qPCR                              |
| miR-200b-Forward               | TAATACTGCCTGGTAATGATGA                                             | qPCR                              |
| miR-410-3p-Forward             | AATATAACACAGATGGCCTGT                                              | qPCR,                             |
| miR-590-5p-Forward             | GAGCTTATTCATAAAAAGTGCAG                                            | qPCR,                             |
| miR-424-Forward                | CAGCAGCAAUUCAUGUUUUGAA                                             | qPCR                              |
| miR-429-Forward                | UAAUACUGUCUGGUA AAAACCGU                                           | qPCR                              |
| miR-410-5p-Forward             | AGGUUGUCUGUGAUGAGUUCG                                              | qPCR RNaseI-enzyme hydrolysis     |
| Pre-miR-410-Forward            | GUCUGUGAUGAGUUCGUUUUA                                              | qPCR,                             |
| Human-ACTB-Forward             | ATGATGATATCGCCGCGCTC                                               | RNaseI-enzyme hydrolysis          |
| Human-ACTB-Reverse             | CCACCATCACGCCCTGG                                                  | RNaseI-enzyme hydrolysis          |
| Mouse-Actb-Forward             | AGCTCCTTCGTTGCCGGTCC                                               | qPCR,                             |
| Mouse-Actb-Reverse             | TCCTCAGGGGCCACACGCA                                                | qPCR,                             |
| Mouse-Vegfa-Forward            | TATTCAGCGGACTCACCAGC                                               | qPCR,                             |
| Mouse-Vegfa-Reverse            | AACCAACCTCCTCAAACCGT                                               | qPCR,                             |
| Human-U6-Forward               | CTCGCTTCGGCAGCACA                                                  | qPCR + RNase A1 hydrolysis        |
| Human-U6-Reverse               | AACGCTTCACGAATTTGCGT                                               | qPCR + RNase A1 hydrolysis        |
| Flag-Forward                   | CTAGAGATTACAAGGATGACGACGATAAGTAA                                   | Plasmid construction/Transfection |
| Flag-Reverse                   | TTACTTATCGTTCGTCATCCTTGTAATCT                                      | Plasmid construction/Transfection |
| Human-Ago2-a-Forward           | GCCACCATGTACTCGGGAGC                                               | Plasmid construction/Transfection |
| Human-Ago2-a-Reverse           | GGCAGGATGACCACCACAG                                                | Plasmid construction/Transfection |
| Human-Ago2-b-Forward           | GGGCATCGAGATCAAGGTGT                                               | Plasmid construction/Transfection |
| Human-Ago2-b-Forward           | CATATTCCTATGACATTGGGTTC                                            | Plasmid construction/Transfection |
| Human-Ago2-a-Forward-2         | GATC AAGCTT GCCACCATGTACTCGGGAGC                                   | Plasmid construction/Transfection |
| Human-Ago2-b-Forward-2         | GATC GAATTC GGGCATCGAGATCAAGGTGT                                   | Plasmid construction/Transfection |
| Human-Ago2-b-Reverse-2         | GATCTCTAGA ATATTCCTATGACATTGGGTTC                                  | Plasmid construction/Transfection |
| Anti-miR410-5p-Forward         | CCGGTCGAACTCATCACAGACAACCT<br>CGAACTCATCACAGACAACCT G              | Plasmid construction/Transfection |
| Anti-miR410-5p-Reverse         | AATTCAGGTTGTCTGATGAGTTCG AGGTTGTCTGATGAGTTCG AGGTTGTCTGATGAGTTCG A | Plasmid construction/Transfection |
| Anti-mock-Forward              | CCGGT UUGUACUACACAAAAGUACUG G                                      | Plasmid construction/Transfection |
| Anti-mock-Reverse              | AATTC UUGUACUACACAAAAGUACUG A                                      | Plasmid construction/Transfection |
| Transgenic Mice-Pb-Cre-Forward | AATGCTTCTGTCCGTTTGC                                                | Transgenic Mice identification    |
| Transgenic Mice-Pb-Cre-Reverse | ACCAGAGTCATCCTTAGCG                                                | Transgenic Mice identification    |

|                              |                                                        |                                |
|------------------------------|--------------------------------------------------------|--------------------------------|
| Transgenic Mice-Pten-Forward | AATTGAAAGCTCAGGGTAGC                                   | Transgenic Mice identification |
| Transgenic Mice-Pten-Forward | ATCTGAACACTTCATCGGGA                                   | Transgenic Mice identification |
| miRNA-RT-a                   | CACTGTCATGCCGTTAGGTAGCGTATCGTTGACAGC TTTTTTTTTTTTTTTA  | miRNA Reverse Transcription    |
| miRNA-RT-c                   | CACTGTCATGCCGTTAGGTAGCGTATCGTTGACAGC TTTTTTTTTTTTTTTC  | miRNA Reverse Transcription    |
| miRNA-RT-g                   | CACTGTCATGCCGTTAGGTAGCGTATCGTTGACAGC TTTTTTTTTTTTTTTTG | miRNA Reverse Transcription    |
| R-miRNA-R1                   | TCATGCCGTTAGGTAGCGTA                                   | miRNA qPCR                     |

**Supplementary Table 3.****Antibodies**

| Name                            | Cat.No.     | Application    | Source | Species reactivity |
|---------------------------------|-------------|----------------|--------|--------------------|
| Anti-AGO2antibody-ChIP Grade    | ab32381     | WB/IF/IP /FCM  | Rabbit | Human/Mouse        |
| Anti-CD63 antibody [EPR5702]    | ab134045    | RIP            | Rabbit | Human              |
| Anti-DDDDK (Flag) antibody      | ab1257      | WB/IF/RIP      | Goat   |                    |
| Donkey anti-Goat IgG H&L (PE)   | ab7004      | IF             | Donkey |                    |
| Donkey Anti-Goat IgG H&L (FITC) | ab6881      | IF             | Donkey |                    |
| Donkey Anti-Rabbit IgG H&L (PE) | ab7007      | IF             | Donkey |                    |
| Goat Anti-Rabbit IgG H&L (HRP)  | ab6721      | WB             | Goat   |                    |
| Goat Anti-Rabbit IgG H&L (FITC) | ab6717      | IF             | Goat   |                    |
| Rabbit Anti-Goat IgG H&L (HRP)  | ab6741      | WB             | Rabbit |                    |
| Anti-beta Actin antibody        | ab8226      | WB             | Mouse  | Human              |
| Anti-beta Actin antibody        | ab129348    | WB             | Rabbit | Mouse              |
| Anti-CD11c antibody             | ab11029     | IF             | Rabbit | Human/Mouse        |
| Anti-Fluorescein antibody       | ab6213      | RIP            | Mouse  |                    |
| Anti-Cy3 / Cy5 antibody         | ab52060     | RIP            | Mouse  |                    |
| Anti-VEGFA antibody             | ab51745     | WB             | Rabbit | Human/Mouse        |
| Anti-CD31 antibody              | ab81289     | IF             | Rabbit | Human/Mouse        |
| Anti-CD11c antibody (APC)       | 130-102-800 | Flow Cytometry |        | Mouse              |
| Anti-CD80 antibody (FITC)       | 130-102-882 | Flow Cytometry |        | Mouse              |
| Anti-CD86 antibody (PE)         | 130-102-604 | Flow Cytometry |        | Mouse              |
| isotype-PE                      | 130-098-845 | Flow Cytometry |        | Mouse              |
| isotype-FITC                    | 130-098-847 | Flow Cytometry |        | Mouse              |

### Supplementary Table 4. Shapiro-Wilk examination

Shapiro-Wilk examination for Figure. 1A

| Tests of Normality <sup>a</sup>                            |   |                                 |    |       |              |    |       |
|------------------------------------------------------------|---|---------------------------------|----|-------|--------------|----|-------|
| Team                                                       |   | Kolmogorov-Smirnov <sup>b</sup> |    |       | Shapiro-Wilk |    |       |
|                                                            |   | Statistic                       | df | Sig.  | Statistic    | df | Sig.  |
| Value                                                      | 2 | 0.232                           | 7  | .200* | 0.881        | 7  | 0.231 |
| *. This is a lower bound of the true significance.         |   |                                 |    |       |              |    |       |
| a. Data is constant when Team = 1.00. It has been omitted. |   |                                 |    |       |              |    |       |
| b. Lilliefors Significance Correction                      |   |                                 |    |       |              |    |       |

Shapiro-Wilk examination for Figure. 2A Up

| Tests of Normality <sup>a,b</sup>                          |   |                                 |    |       |              |    |       |
|------------------------------------------------------------|---|---------------------------------|----|-------|--------------|----|-------|
| Team                                                       |   | Kolmogorov-Smirnov <sup>c</sup> |    |       | Shapiro-Wilk |    |       |
|                                                            |   | Statistic                       | df | Sig.  | Statistic    | df | Sig.  |
| Value                                                      | 3 | 0.194                           | 6  | .200* | 0.934        | 6  | 0.586 |
|                                                            | 4 | 0.265                           | 6  | 0.147 | 0.901        | 6  | 0.335 |
|                                                            | 5 | 0.21                            | 6  | .200* | 0.964        | 6  | 0.849 |
|                                                            | 6 | 0.175                           | 6  | .200* | 0.916        | 6  | 0.436 |
| *. This is a lower bound of the true significance.         |   |                                 |    |       |              |    |       |
| a. Data is constant when Team = 1.00. It has been omitted. |   |                                 |    |       |              |    |       |
| b. Data is constant when Team = 2.00. It has been omitted. |   |                                 |    |       |              |    |       |
| c. Lilliefors Significance Correction                      |   |                                 |    |       |              |    |       |

Shapiro-Wilk examination for Figure. 2A Down

| Tests of Normality <sup>a,b</sup>                          |   |                                 |    |       |              |    |       |
|------------------------------------------------------------|---|---------------------------------|----|-------|--------------|----|-------|
| Team                                                       |   | Kolmogorov-Smirnov <sup>c</sup> |    |       | Shapiro-Wilk |    |       |
|                                                            |   | Statistic                       | df | Sig.  | Statistic    | df | Sig.  |
| Value                                                      | 3 | 0.205                           | 6  | .200* | 0.946        | 6  | 0.697 |
|                                                            | 4 | 0.153                           | 6  | .200* | 0.963        | 6  | 0.846 |
|                                                            | 5 | 0.202                           | 6  | .200* | 0.886        | 6  | 0.255 |
|                                                            | 6 | 0.192                           | 6  | .200* | 0.924        | 6  | 0.497 |
| *. This is a lower bound of the true significance.         |   |                                 |    |       |              |    |       |
| a. Data is constant when Team = 1.00. It has been omitted. |   |                                 |    |       |              |    |       |
| b. Data is constant when Team = 2.00. It has been omitted. |   |                                 |    |       |              |    |       |
| c. Lilliefors Significance Correction                      |   |                                 |    |       |              |    |       |

Shapiro-Wilk examination for Figure. 3A Left

| Tests of Normality |   |                                 |    |       |              |    |       |
|--------------------|---|---------------------------------|----|-------|--------------|----|-------|
| Team               |   | Kolmogorov-Smirnov <sup>a</sup> |    |       | Shapiro-Wilk |    |       |
|                    |   | Statistic                       | df | Sig.  | Statistic    | df | Sig.  |
|                    | 1 | 0.155                           | 6  | .200* | 0.982        | 6  | 0.967 |
|                    | 2 | 0.114                           | 6  | .200* | 0.997        | 6  | 1     |

|                                                    |   |       |   |       |       |   |       |
|----------------------------------------------------|---|-------|---|-------|-------|---|-------|
| Value                                              | 3 | 0.114 | 6 | .200* | 0.997 | 6 | 1     |
|                                                    | 4 | 0.141 | 6 | .200* | 0.974 | 6 | 0.925 |
| *. This is a lower bound of the true significance. |   |       |   |       |       |   |       |
| a. Lilliefors Significance Correction              |   |       |   |       |       |   |       |

Shapiro-Wilk examination for Figure. 3A Right

| Tests of Normality                                 |   |                                 |    |       |              |    |       |
|----------------------------------------------------|---|---------------------------------|----|-------|--------------|----|-------|
| Team                                               |   | Kolmogorov-Smirnov <sup>a</sup> |    |       | Shapiro-Wilk |    |       |
|                                                    |   | Statistic                       | df | Sig.  | Statistic    | df | Sig.  |
| Value                                              | 1 | 0.137                           | 6  | .200* | 0.992        | 6  | 0.996 |
|                                                    | 2 | 0.245                           | 6  | .200* | 0.884        | 6  | 0.245 |
|                                                    | 3 | 0.169                           | 6  | .200* | 0.923        | 6  | 0.496 |
|                                                    | 4 | 0.191                           | 6  | .200* | 0.967        | 6  | 0.875 |
| *. This is a lower bound of the true significance. |   |                                 |    |       |              |    |       |
| a. Lilliefors Significance Correction              |   |                                 |    |       |              |    |       |

Shapiro-Wilk examination for Figure. 3C Right

| Tests of Normality                                 |   |                                 |    |       |              |    |       |
|----------------------------------------------------|---|---------------------------------|----|-------|--------------|----|-------|
| Team                                               |   | Kolmogorov-Smirnov <sup>a</sup> |    |       | Shapiro-Wilk |    |       |
|                                                    |   | Statistic                       | df | Sig.  | Statistic    | df | Sig.  |
| Value                                              | 1 | 0.135                           | 9  | .200* | 0.963        | 9  | 0.848 |
|                                                    | 2 | 0.314                           | 9  | 0.036 | 0.82         | 9  | 0.064 |
|                                                    | 3 | 0.272                           | 9  | 0.126 | 0.832        | 9  | 0.084 |
|                                                    | 4 | 0.228                           | 9  | .200* | 0.95         | 9  | 0.732 |
|                                                    | 5 | 0.214                           | 9  | .200* | 0.918        | 9  | 0.454 |
|                                                    | 6 | 0.13                            | 9  | .200* | 0.977        | 9  | 0.942 |
| *. This is a lower bound of the true significance. |   |                                 |    |       |              |    |       |
| a. Lilliefors Significance Correction              |   |                                 |    |       |              |    |       |

Shapiro-Wilk examination for Figure. 4A Left

| Tests of Normality <sup>a</sup>                            |   |                                 |    |       |              |    |       |
|------------------------------------------------------------|---|---------------------------------|----|-------|--------------|----|-------|
| Team                                                       |   | Kolmogorov-Smirnov <sup>b</sup> |    |       | Shapiro-Wilk |    |       |
|                                                            |   | Statistic                       | df | Sig.  | Statistic    | df | Sig.  |
| Value                                                      | 2 | 0.184                           | 10 | .200* | 0.944        | 10 | 0.678 |
|                                                            | 3 | 0.145                           | 10 | .200* | 0.967        | 10 | 0.875 |
|                                                            | 4 | 0.164                           | 10 | .200* | 0.932        | 10 | 0.572 |
| *. This is a lower bound of the true significance.         |   |                                 |    |       |              |    |       |
| a. Data is constant when Team = 1.00. It has been omitted. |   |                                 |    |       |              |    |       |
| b. Lilliefors Significance Correction                      |   |                                 |    |       |              |    |       |

Shapiro-Wilk examination for Figure. 4B Right

| Tests of Normality |  |  |  |  |  |  |  |
|--------------------|--|--|--|--|--|--|--|
|--------------------|--|--|--|--|--|--|--|

| Team                                               |   | Kolmogorov-Smirnov <sup>a</sup> |    |       | Shapiro-Wilk |    |       |
|----------------------------------------------------|---|---------------------------------|----|-------|--------------|----|-------|
|                                                    |   | Statistic                       | df | Sig.  | Statistic    | df | Sig.  |
| Value                                              | 1 | 0.156                           | 9  | .200* | 0.988        | 9  | 0.989 |
|                                                    | 2 | 0.195                           | 9  | .200* | 0.944        | 9  | 0.678 |
| *. This is a lower bound of the true significance. |   |                                 |    |       |              |    |       |
| a. Lilliefors Significance Correction              |   |                                 |    |       |              |    |       |

Shapiro-Wilk examination for Figure. 4D Right

| <b>Tests of Normality</b>                          |   |                                 |    |       |              |    |       |
|----------------------------------------------------|---|---------------------------------|----|-------|--------------|----|-------|
| Team                                               |   | Kolmogorov-Smirnov <sup>a</sup> |    |       | Shapiro-Wilk |    |       |
|                                                    |   | Statistic                       | df | Sig.  | Statistic    | df | Sig.  |
| Value                                              | 1 | 0.156                           | 18 | .200* | 0.988        | 18 | 0.989 |
|                                                    | 2 | 0.212                           | 12 | .200* | 0.968        | 12 | 0.883 |
| *. This is a lower bound of the true significance. |   |                                 |    |       |              |    |       |
| a. Lilliefors Significance Correction              |   |                                 |    |       |              |    |       |

Shapiro-Wilk examination for Figure. 4E Left

| <b>Tests of Normality<sup>a</sup></b>                      |   |                                 |    |       |              |    |       |
|------------------------------------------------------------|---|---------------------------------|----|-------|--------------|----|-------|
| Team                                                       |   | Kolmogorov-Smirnov <sup>b</sup> |    |       | Shapiro-Wilk |    |       |
|                                                            |   | Statistic                       | df | Sig.  | Statistic    | df | Sig.  |
| Value                                                      | 2 | 0.187                           | 28 | .200* | 0.959        | 28 | 0.811 |
|                                                            | 3 | 0.155                           | 28 | .200* | 0.99         | 28 | 0.993 |
|                                                            | 4 | 0.291                           | 28 | 0.075 | 0.873        | 28 | 0.199 |
| *. This is a lower bound of the true significance.         |   |                                 |    |       |              |    |       |
| a. Data is constant when Team = 1.00. It has been omitted. |   |                                 |    |       |              |    |       |
| b. Lilliefors Significance Correction                      |   |                                 |    |       |              |    |       |

Shapiro-Wilk examination for Figure. 4E Right

| <b>Tests of Normality</b>                          |   |                                 |    |       |              |    |       |
|----------------------------------------------------|---|---------------------------------|----|-------|--------------|----|-------|
| Team                                               |   | Kolmogorov-Smirnov <sup>a</sup> |    |       | Shapiro-Wilk |    |       |
|                                                    |   | Statistic                       | df | Sig.  | Statistic    | df | Sig.  |
| Value                                              | 1 | 0.333                           | 42 | 0.018 | 0.843        | 42 | 0.107 |
|                                                    | 2 | 0.243                           | 42 | .200* | 0.88         | 42 | 0.228 |
| *. This is a lower bound of the true significance. |   |                                 |    |       |              |    |       |
| a. Lilliefors Significance Correction              |   |                                 |    |       |              |    |       |
